# Supplementary material for: Factors Influencing Level and Persistence of Anti SARS-CoV-2 IgG after BNT162b2 Vaccine: Evidence from a Large Cohort of Healthcare Workers
Source: MDPI journal article supplement (doi:10.3390/vaccines10030474), 2022-03-18

**Table S1. Prevalence of seropositivity and median serological values among HCW of CSS participating to the serological post-vaccination survey on May 2021**

|                                                                                                        | Number      | Serological test positivity<br>N (%) | IgG value<br>(BAU/mL)<br>(median, IQR) |
|--------------------------------------------------------------------------------------------------------|-------------|--------------------------------------|----------------------------------------|
|                                                                                                        |             |                                      |                                        |
|                                                                                                        |             |                                      |                                        |
| <b>Participants</b>                                                                                    | <b>7729</b> | <b>7618 (98.6%)</b>                  | 961 (523-1840)                         |
| Questionnaire filled                                                                                   | 6824        | 6742 (98.8%)                         | 968 (531-1850)                         |
| Questionnaire not filled                                                                               | 905         | 876 (96.8%)                          | 918 (462-1780)                         |
|                                                                                                        |             |                                      |                                        |
| <b>Participants, with questionnaire filled, by vaccination<br/>against SARS-CoV-2 (up to May 2021)</b> |             |                                      |                                        |
| Yes, 1 dose                                                                                            | 132         | 131 (99.2%)                          | 2080 (485-2080)                        |
| Yes, both doses                                                                                        | 6562        | 6551 (99.8%)                         | 982 (552-1840)                         |
| No                                                                                                     | 130         | 60 (46.2%)                           | 17 (4.81-206)                          |
|                                                                                                        |             |                                      |                                        |
| <b>Participants included in analyses*</b>                                                              | <b>6687</b> | <b>6675 (99.8%)</b>                  | 990 (551-1870)                         |

\* with questionnaire filled, vaccinated by May 2021 and with a distance between vaccination and serological test  $\geq$  14 days

**Table S2. Quintile distribution of serological values among the 6687 HCW of CSS participating to the serological post-vaccination survey on May 2021**

| Serological test values<br>(quintile cut-off) | Number |
|-----------------------------------------------|--------|
| $\leq 475$                                    | 1340   |
| 476-789                                       | 1336   |
| 790-1250                                      | 1351   |
| 1251-2079                                     | 1252   |
| $\geq 2080$                                   | 1408   |

**Table S3. Multivariable ordinal logistic regression model (ORs and 95% CI) for predictors of lower serological values (quintiles of distribution) among vaccinated HCW of CSS.**

|                                                 | OR   | 95%CI     | p-values |
|-------------------------------------------------|------|-----------|----------|
| <b>Age (year)</b>                               | 1.03 | 1.02-1.03 | <0.001   |
| <b>Gender</b>                                   |      |           |          |
| Female                                          | 1.00 |           |          |
| Male                                            | 1.17 | 1.05-1.31 | 0.005    |
| <b>Job profile</b>                              |      |           |          |
| Nurse                                           | 1.00 |           |          |
| Physician                                       | 0.99 | 0.87-1.12 | 0.876    |
| Health care assistant (HCA)                     | 0.97 | 0.83-1.14 | 0.738    |
| Clinical staff (other than physician/nurse/HCA) | 1.04 | 0.91-1.19 | 0.592    |
| Administrative staff                            | 1.00 | 0.85-1.19 | 0.959    |
| IT/maintenance staff                            | 0.99 | 0.75-1.29 | 0.919    |
| <b>Smoking habit</b>                            |      |           |          |
| Never smokers                                   | 1.00 |           |          |
| Former smokers                                  | 1.11 | 0.98-1.25 | 0.101    |
| Current smokers                                 | 2.00 | 1.79-2.25 | <0.001   |
| <b>BMI</b>                                      |      |           |          |
| Normal weight (BMI 18.5-25)                     | 1.00 |           |          |
| Underweight (BMI <18.5)                         | 1.13 | 0.91-1.42 | 0.264    |
| Overweight (BMI 25-30)                          | 0.90 | 0.81-1.01 | 0.074    |
| Obesity (BMI 30-40)                             | 0.89 | 0.75-1.04 | 0.144    |
| Severe Obesity (BMI >40)                        | 0.87 | 0.51-1.48 | 0.605    |
| <b>ABO blood group</b>                          |      |           |          |
| O                                               | 1.00 |           |          |
| A                                               | 0.97 | 0.87-1.09 | 0.609    |
| AB                                              | 1.01 | 0.82-1.25 | 0.926    |
| B                                               | 0.93 | 0.80-1.09 | 0.393    |
| Unknown                                         | 0.95 | 0.83-1.07 | 0.385    |
| <b>Autoimmune diseases</b>                      |      |           |          |
| No                                              | 1.00 |           |          |
| Yes                                             | 0.97 | 0.85-1.11 | 0.650    |
| <b>Immuno-deficiency</b>                        |      |           |          |
| No                                              | 1.00 |           |          |
| Yes                                             | 2.22 | 1.44-3.42 | <0.001   |
| <b>Hypertension</b>                             |      |           |          |
| No                                              | 1.00 |           |          |
| Yes                                             | 1.00 | 0.87-1.14 | 0.998    |
| <b>Diabetes</b>                                 |      |           |          |
| No                                              | 1.00 |           |          |
| Yes                                             | 1.02 | 0.75-1.38 | 0.924    |
| <b>Cardiovascular diseases</b>                  |      |           |          |
| No                                              | 1.00 |           |          |
| Yes                                             | 1.10 | 0.83-1.45 | 0.522    |
| <b>Allergic rhinitis</b>                        |      |           |          |
| No                                              | 1.00 |           |          |
| Yes                                             | 0.93 | 0.81-1.06 | 0.261    |
| <b>Respiratory diseases</b>                     |      |           |          |
| No                                              | 1.00 |           |          |
| Yes                                             | 1.14 | 0.85-1.53 | 0.378    |
| <b>Kidney diseases</b>                          |      |           |          |
| No                                              | 1.00 |           |          |
| Yes                                             | 1.30 | 0.72-2.34 | 0.377    |
| <b>Neurological diseases</b>                    |      |           |          |

|                                                                 |      |           |        |
|-----------------------------------------------------------------|------|-----------|--------|
| No                                                              | 1.00 |           |        |
| Yes                                                             | 0.75 | 0.41-1.36 | 0.344  |
| <b>Neoplasms</b>                                                |      |           |        |
| No                                                              | 1.00 |           |        |
| Yes                                                             | 0.74 | 0.54-1.01 | 0.058  |
| <b>Other chronic diseases</b>                                   |      |           |        |
| No                                                              | 1.00 |           |        |
| Yes                                                             | 1.16 | 0.81-1.67 | 0.410  |
| <b>Previous SARS-CoV-2 infection*</b>                           |      |           |        |
| No                                                              | 1.00 |           |        |
| Yes                                                             | 0.13 | 0.11-0.15 | <0.001 |
| <b>Contacts with colleagues in 2021</b>                         |      |           |        |
| No                                                              | 1.00 |           |        |
| Yes                                                             | 1.15 | 1.04-1.27 | 0.007  |
| <b>Contacts with inpatients in 2021</b>                         |      |           |        |
| No                                                              | 1.00 |           |        |
| Yes                                                             | 1.01 | 0.92-1.12 | 0.790  |
| <b>Household contacts in 2021</b>                               |      |           |        |
| No                                                              | 1.00 |           |        |
| Yes                                                             | 0.73 | 0.62-0.87 | <0.001 |
| <b>Other contacts in 2021</b>                                   |      |           |        |
| No                                                              | 1.00 |           |        |
| Yes                                                             | 1.13 | 0.90-1.44 | 0.287  |
| <b>Distance (week) between vaccination and serological test</b> | 1.30 | 1.27-1.32 | <0.001 |

*\*From March 2020 to the date of serological survey (May 2021).*

Figure S1. Flow chart of the study cohort of HCW of CSS

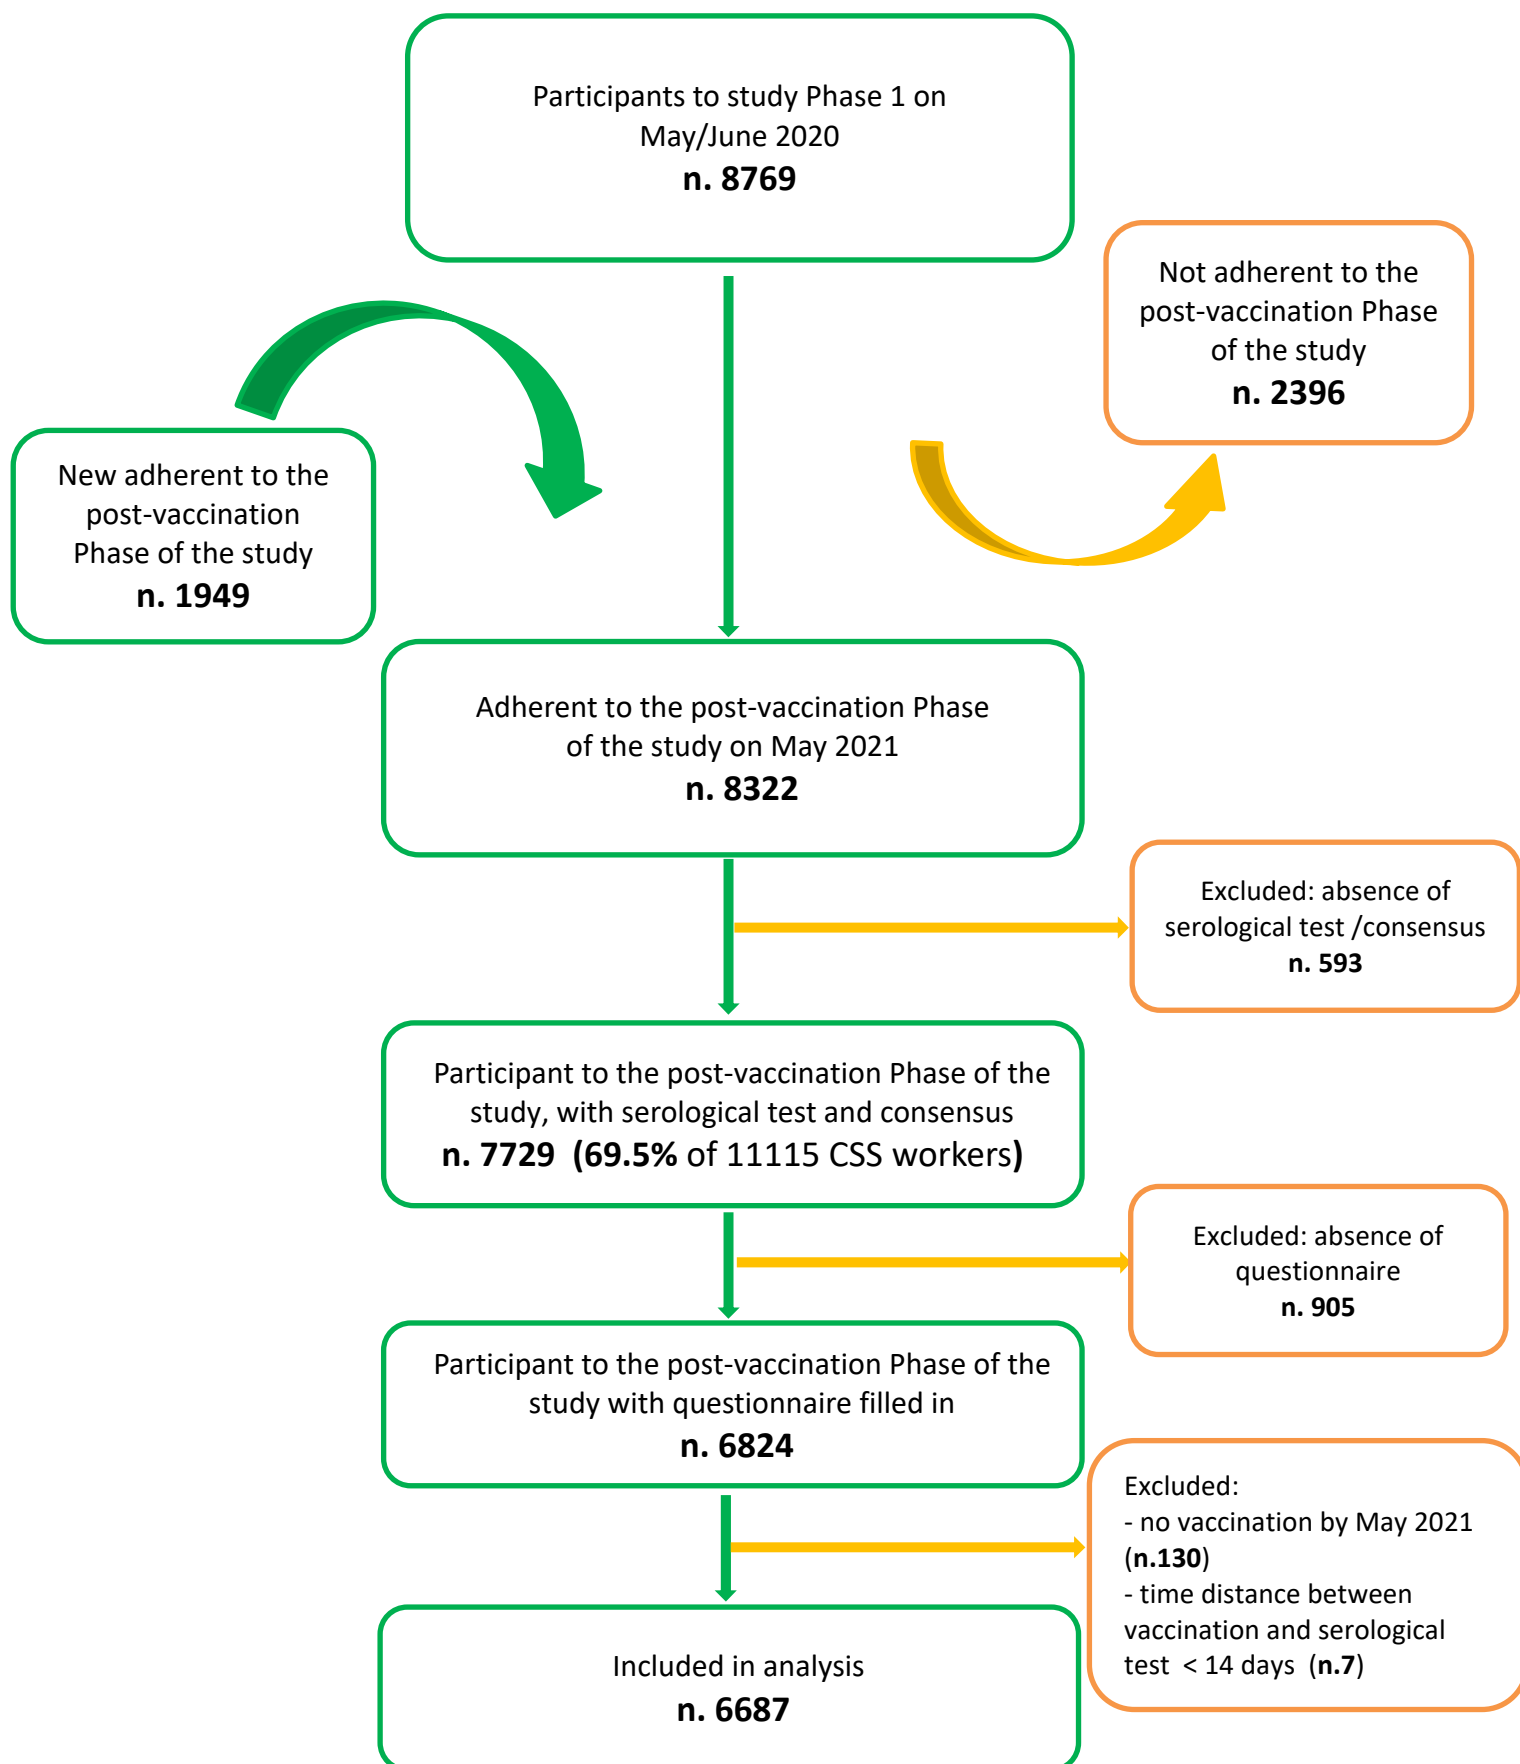

**Figure S2.** Box-plot of IgG values according to distance (months) between vaccination and serological test on May 2021, by self-reported immunodeficiency.

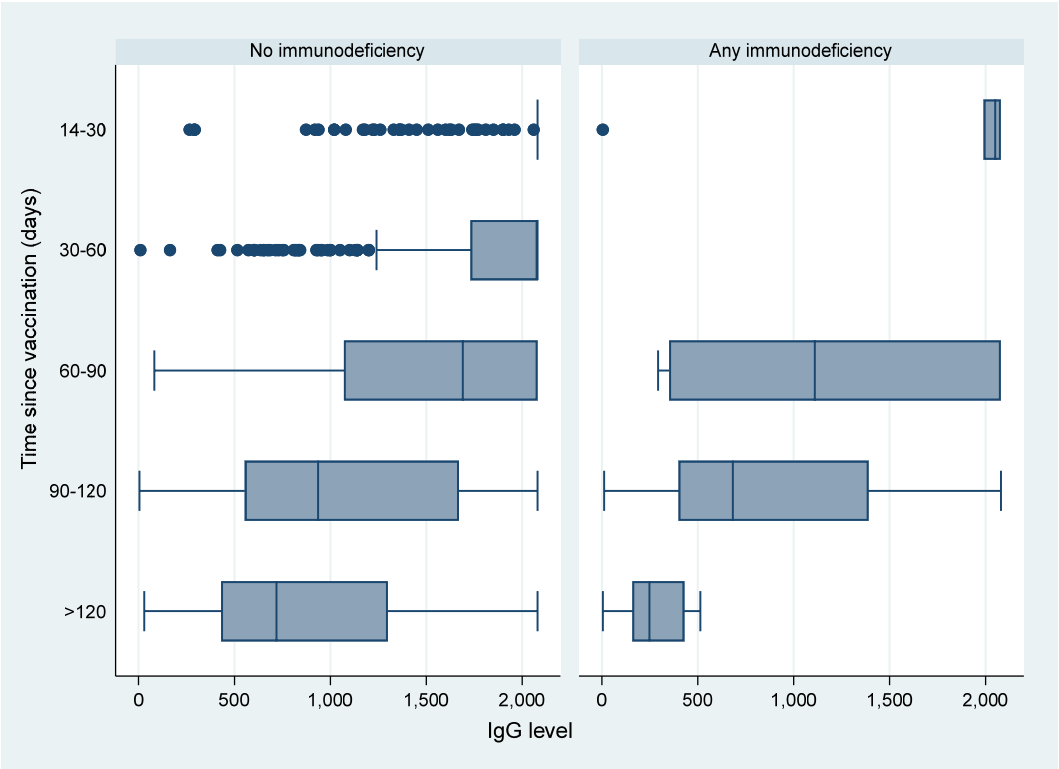

Supplement: s1 [file s1]
